# Supplementary material for: The cost‐effectiveness of universal late‐pregnancy screening for macrosomia in nulliparous women: a decision analysis
Source: PubMed Central journal article supplement (PMC6771727; doi:10.1111/1471-0528.15809), 2019-06-05
Supplement: BJO-126-1243-s001.pdf [file BJO-126-1243-s001.pdf]

**Table S1.** Input values for simulated model

| Parameter                                 | Mean   | 95% CI          | Distribution and inputs      | Source                         |
|-------------------------------------------|--------|-----------------|------------------------------|--------------------------------|
| <b>Screening probabilities</b>            |        |                 |                              |                                |
| Macrosomia prevalence                     | 0.1107 | 0.1008, 0.1206  | ~Normal(0.1107, 0.005)       | Sovio et al. <sup>10</sup>     |
| Sensitivity 'Universal ultrasound'        | 0.3785 | 0.3087, 0.4510  | ~Beta(67, 110)               | Sovio et al. <sup>10</sup>     |
| Specificity 'Universal ultrasound'        | 0.9656 | 0.9595, 0.9712  | ~Beta(3562, 127)             | Sovio et al. <sup>10</sup>     |
| Sensitivity 'Selective ultrasound'        | 0.2655 | 0.2033, 0.3328  | ~Beta(47, 130)               | Sovio et al. <sup>10</sup>     |
| Specificity 'Selective ultrasound'        | 0.9867 | 0.9828, 0.9902  | ~Beta(3640, 49)              | Sovio et al. <sup>10</sup>     |
| <b>Management probabilities</b>           |        |                 |                              |                                |
| Risk of emergency CS, induced             | 0.1632 | 0.1520, 0.1744  | ~Normal(0.1632, 0.0057)      | Middleton et al. <sup>11</sup> |
| Risk of emergency CS, expectant           | 0.1842 | 0.1771, 0.2017  | ~Normal(0.1842, 0.0063)      | Middleton et al. <sup>11</sup> |
| RR of emergency CS, macrosomia suspected  | 1.5165 | 0.9899, 2.3232  | ~Log-normal(0.4164, 0.2176)  | Blackwell et al. <sup>12</sup> |
| <b>Long-term probabilities</b>            |        |                 |                              |                                |
| NICU rate from respiratory morbidity      | 0.175  | 0.056, 0.294    | ~Uniform(0.05, 0.30)         | Expert opinion                 |
| BPI risk if shoulder dystocia             | 0.0856 | 0.0614, 0.1098  | ~Normal(0.0856, 0.0123)      | MacKenzie et al. <sup>13</sup> |
| Anoxia risk if shoulder dystocia          | 0.07   | 0.0480, 0.0921  | ~Normal(0.0700, 0.0113)      | MacKenzie et al. <sup>13</sup> |
| Risk of permanent BPI                     | 0.075  | 0.051, 0.988    | ~Uniform(0.05, 0.10)         | RCOG GTG No. 42 <sup>14</sup>  |
| Risk of severe anoxic brain damage †      | 0.1527 | 0.1145, 0.1908  | ~Normal(0.1527, 0.0195)      | Graham et al. <sup>15</sup>    |
| Mortality from anoxia †                   | 0.0524 | 0.0321, 0.0728  | ~Normal(0.0524, 0.0104)      | Graham et al. <sup>15</sup>    |
| <b>Neonatal delivery probabilities</b>    |        |                 |                              |                                |
| Respiratory morbidity (baseline)          | 0.0032 | 0.0018, 0.0046  | ~Normal(0.0032, 0.0007)      | Morrison et al. <sup>1</sup>   |
| RR of respiratory morbidity, macrosomia   | 0.75   | 0.5125, 0.9875  | ~Uniform(0.50, 1.00)         | Expert opinion                 |
| RR of respiratory morbidity, induced      | 0.5654 | 0.3900, 0.8196  | ~Log-normal(-0.5703, 0.1892) | Gibson et al. <sup>16</sup>    |
| RR of respiratory morbidity, elective CS  | 5.7182 | 2.6190, 12.4850 | ~Log-normal(1.7437, 0.3984)  | Morrison et al. <sup>1</sup>   |
| RR of respiratory morbidity, emergency CS | 5.1946 | 2.0934, 12.8900 | ~Log-normal(1.6476, 0.4637)  | Morrison et al. <sup>1</sup>   |
| Shoulder dystocia (baseline)              | 0.64   | 0.58, 0.97      | ~Uniform(0.58, 0.70)         | RCOG GTG No. 42 <sup>14</sup>  |
| RR of shoulder dystocia, macrosomia       | 7.7631 | 4.5956, 13.1143 | ~Log-normal(2.0494, 0.2675)  | Rossi et al. <sup>17</sup>     |
| RR of shoulder dystocia, induced          | 0.5781 | 0.3447, 0.9697  | ~Log-normal(-0.781, 0.2638)  | Boulvain et al. <sup>18</sup>  |
| RR of shoulder dystocia, elective CS      | 0      | N/A             | N/A                          | Assumption                     |
| RR of shoulder dystocia, emergency CS     | 0      | N/A             | N/A                          | Assumption                     |
| Other acidosis (baseline)                 | 0.0068 | 0.0022, 0.0140  | ~Beta(5, 726)                | Middleton et al. <sup>11</sup> |
| RR of other acidosis, macrosomia          | 5.7953 | 3.0198, 11.1228 | ~Log-normal(1.7571, 0.3326)  | Rossi et al. <sup>17</sup>     |

|                                    |        |                |                              |                                          |
|------------------------------------|--------|----------------|------------------------------|------------------------------------------|
| RR of other acidosis, induced      | 1.8201 | 0.6070, 5.4580 | ~Log-normal(0.5989, 0.5603)  | Middleton et al. <sup>11</sup>           |
| RR of other acidosis, elective CS  | 0.3014 | 0.1088, 0.8347 | ~Log-normal(-1.1993, 0.5197) | Chongsuivatwong et al. <sup>19</sup>     |
| RR of other acidosis, emergency CS | 1.8674 | 1.2173, 2.8647 | ~Log-normal(0.6245, 0.2183)  | Chongsuivatwong et al. <sup>19</sup>     |
| Mortality (baseline)               | 0.0038 | 0.0036, 0.0040 | ~Normal(0.0038, 0.0001)      | ONS <sup>20</sup>                        |
| RR of mortality, macrosomia        | 3.3494 | 1.7057, 6.5773 | ~Log-normal(1.2088, 0.3443)  | Rossi et al. <sup>17</sup>               |
| RR of mortality, induced           | 0.1242 | 0.0286, 0.5407 | ~Log-normal(-2.0855, 0.7503) | Middleton et al. <sup>11</sup>           |
| RR of mortality, elective CS       | 0.31   | 0.14, 0.67     | ~Log-normal(-1.1712, 0.4003) | Chongsuivatwong et al. <sup>19</sup>     |
| RR of mortality, emergency CS      | 1.68   | 1.19, 2.37     | ~Log-normal(0.5934, 0.3445)  | Chongsuivatwong et al. <sup>19</sup>     |
| <b>Cost (£)</b>                    |        |                |                              |                                          |
| Ultrasound cost                    | 107.54 | 86.37, 128.71  | ~Normal(107.54, 10.8)        | NHS Reference costs 2016-17 <sup>2</sup> |
| Delivery cost, vaginal             | 2478.4 | 1992.3, 2964.5 | ~Normal(2478.4, 248)         | NHS Reference costs 2016-17 <sup>2</sup> |
| Delivery cost, elective CS         | 3555.8 | 2858.0, 4253.6 | ~Normal(3555.8, 356)         | NHS Reference costs 2016-17 <sup>2</sup> |
| Delivery cost, emergency CS        | 4774.7 | 3839.8, 5709.6 | ~Normal(4774.7, 477)         | NHS Reference costs 2016-17 <sup>2</sup> |
| Respiratory morbidity ††           | 2010   | N/A            | Point estimate               | Morrison et al. <sup>1</sup>             |
| Induction cost ††                  | 278.5  | 220.1, 336.9   | ~Uniform(217, 340)           | NHS Reference costs 2016-17 <sup>2</sup> |
| Mortality cost                     | 1623   | 1305, 1941     | ~Normal(1623, 162)           | Regier et al. <sup>21</sup>              |
| Transient BPI ††                   | 2066   | N/A            | Point estimate               | Culligan et al. <sup>4</sup>             |
| Permanent BPI ††                   | 14133  | N/A            | Point estimate               | Culligan et al. <sup>4</sup>             |
| Non-severe anoxia                  | 2590   | 1360, 3820     | ~Uniform(1295, 3885)         | Expert opinion                           |
| Severe anoxic brain damage         | 18632  | N/A            | Point estimate               | Regier et al. <sup>21</sup>              |
| <b>Neonatal utility</b>            |        |                |                              |                                          |
| BPI - short-term                   | 0.95   | 0.903, 0.998   | ~Uniform(0.90, 1.00)         | Culligan et al. <sup>4</sup>             |
| BPI - long-term                    | 0.6    | 0.505, 0.695   | ~Uniform(0.50, 0.70)         | Culligan et al. <sup>4</sup>             |
| Anoxia - short-term                | 0.975  | 0.951, 0.999   | ~Uniform(0.95, 1.00)         | Expert opinion                           |
| Severe anoxic brain damage         | 0.63   | 0.616, 0.644   | ~Normal(0.63, 0.007)         | Leigh et al. <sup>22</sup>               |
| <b>Maternal utility</b>            |        |                |                              |                                          |
| Delivery - Vaginal                 | 0.939  | 0.925, 0.953   | ~Normal(0.939, 0.007)        | Petrou et al. <sup>23</sup>              |
| Delivery – ELCS                    | 0.882  | 0.839, 0.925   | ~Normal(0.882, 0.022)        | Petrou et al. <sup>23</sup>              |
| Delivery – EMCS                    | 0.935  | 0.904, 0.966   | ~Normal(0.935, 0.016)        | Petrou et al. <sup>23</sup>              |

Input values for the simulation model (see Fig 1). All prices are updated to the price level of 2016/17 using the hospital & community health services (HCHS) index.<sup>6</sup>

BPI = Brachial Plexus Injury; CI = Confidence interval; CS = Caesarean section; IOL = Induction of labour; NICU = Neonatal intensive care unit; RR = Relative risk.

† The mean and standard deviation has been lowered by 11.1% from the original source, following neonatal cooling, in accordance with Edwards et al.<sup>24</sup>

†† For details on calculations, see Appendix S2.
