# Supplementary material for: The cost‐effectiveness of universal late‐pregnancy screening for macrosomia in nulliparous women: a decision analysis
Source: PubMed Central journal article supplement (PMC6771727; doi:10.1111/1471-0528.15809), 2019-06-05
Supplement: BJO-126-1243-s003.pdf [file BJO-126-1243-s003.pdf]

**Table S2.** Expected share of mode of delivery and level of fetal complications per screening and management strategy

| Strategy                  | Mode of delivery |             |              | Fetal delivery outcome |        |        |          |        |
|---------------------------|------------------|-------------|--------------|------------------------|--------|--------|----------|--------|
|                           | Vaginal          | Elective CS | Emergency CS | No comp                | RM     | SD     | Acidosis | Death  |
| Universal US + planned CS | 75.7%            | 7.3%        | 17.1%        | 97.025%                | 0.669% | 0.724% | 1.070%   | 0.511% |
| Universal US + induction  | 81.7%            | 0.0%        | 18.3%        | 96.678%                | 0.565% | 0.836% | 1.420%   | 0.501% |
| Universal US + expectant  | 80.8%            | 0.0%        | 19.2%        | 96.713%                | 0.592% | 0.885% | 1.237%   | 0.573% |
| Selective US + planned CS | 78.2%            | 4.1%        | 17.7%        | 96.934%                | 0.630% | 0.784% | 1.121%   | 0.531% |
| Selective US + induction  | 81.7%            | 0.0%        | 18.3%        | 96.691%                | 0.573% | 0.859% | 1.353%   | 0.524% |
| Selective US + expectant  | 81.2%            | 0.0%        | 18.8%        | 96.717%                | 0.588% | 0.893% | 1.232%   | 0.571% |

US = Ultrasound scan; CS = Caesarean section; No comp = No complications; RM = Respiratory morbidity; SD = Shoulder dystocia; Acidosis = Other acidosis (acidosis unrelated to shoulder dystocia).
