# Supplementary material for: The cost‐effectiveness of universal late‐pregnancy screening for macrosomia in nulliparous women: a decision analysis
Source: PubMed Central journal article supplement (PMC6771727; doi:10.1111/1471-0528.15809), 2019-06-05
Supplement: BJO-126-1243-s004.pdf [file BJO-126-1243-s004.pdf]

**Table S4.** Expected costs and QALYs per screening and management strategy, alternative scenarios

| Scenario                                                          | Policy                           | Cost (95% CI)            | QALY (95% CI)                  | ICER        | Estimated NMB (95% CI)         |
|-------------------------------------------------------------------|----------------------------------|--------------------------|--------------------------------|-------------|--------------------------------|
| Base case scenario                                                | Selective US + expectant         | 2821 (2409, 3236)        | 27.441 (27.262, 27.621)        | -           | 546007 (542803, 549204)        |
|                                                                   | <b>Selective US + induction</b>  | <b>2826 (2412, 3242)</b> | <b>27.446 (27.267, 27.626)</b> | <b>904</b>  | <b>546098 (542890, 549298)</b> |
|                                                                   | Selective US + planned CS        | 2833 (2436, 3230)        | 27.417 (27.244, 27.588)        | Dominated   | 545501 (542424, 548561)        |
|                                                                   | Universal US + expectant         | 2933 (2502, 3366)        | 27.441 (27.261, 27.621)        | Dominated   | 545884 (542695, 549070)        |
|                                                                   | Universal US + induction         | 2939 (2506, 3374)        | 27.448 (27.268, 27.628)        | 52719       | 546028 (542829, 549214)        |
|                                                                   | Universal US + planned CS        | 2955 (2549, 3360)        | 27.396 (27.224, 27.565)        | Dominated   | 544956 (541919, 547978)        |
| Maternal QALYs excluded from analysis                             | Selective US + expectant         | 2821 (2409, 3236)        | 14.107 (14.069, 14.134)        | -           | 279314 (278388, 280056)        |
|                                                                   | Selective US + induction         | 2826 (2412, 3242)        | 14.111 (14.074, 14.137)        | 965         | 279399 (278486, 280125)        |
|                                                                   | <b>Selective US + planned CS</b> | <b>2833 (2436, 3230)</b> | <b>14.115 (14.082, 14.138)</b> | <b>1923</b> | <b>279463 (278642, 280135)</b> |
|                                                                   | Universal US + expectant         | 2933 (2502, 3366)        | 14.106 (14.068, 14.134)        | Dominated   | 279195 (278251, 279955)        |
|                                                                   | Universal US + induction         | 2939 (2506, 3360)        | 14.113 (14.075, 14.139)        | Dominated   | 279328 (278384, 280070)        |
|                                                                   | Universal US + planned CS        | 2955 (2549, 3360)        | 14.119 (14.087, 14.141)        | 31617.62    | 279418 (278629, 280072)        |
| No costs for induction of labour                                  | Selective US + expectant         | 2821 (2409, 3236)        | 27.441 (27.262, 27.621)        | Dominated   | 546007 (542803, 549204)        |
|                                                                   | <b>Selective US + induction</b>  | <b>2814 (2401, 3230)</b> | <b>27.446 (27.267, 27.626)</b> | -           | <b>546110 (542900, 549310)</b> |
|                                                                   | Selective US + planned CS        | 2833 (2436, 3230)        | 27.417 (27.244, 27.588)        | Dominated   | 545501 (542424, 548561)        |
|                                                                   | Universal US + expectant         | 2933 (2502, 3366)        | 27.441 (27.261, 27.621)        | Dominated   | 545884 (542695, 549070)        |
|                                                                   | Universal US + induction         | 2919 (2486, 3353)        | 27.448 (27.268, 27.628)        | 52500       | 546048 (542850, 549235)        |
|                                                                   | Universal US + planned CS        | 2955 (2549, 3360)        | 27.396 (27.224, 27.565)        | Dominated   | 544956 (541919, 547978)        |
| Induction of labour is cost-saving by £263 (95% CI: -£646, £174). | Selective US + expectant         | 2821 (2409, 3236)        | 27.441 (27.262, 27.621)        | Dominated   | 546007 (542803, 549204)        |
|                                                                   | <b>Selective US + induction</b>  | <b>2813 (2400, 3229)</b> | <b>27.446 (27.267, 27.626)</b> | -           | <b>546111 (542903, 549311)</b> |
|                                                                   | Selective US + planned CS        | 2833 (2436, 3230)        | 27.417 (27.244, 27.588)        | Dominated   | 545501 (542424, 548561)        |
|                                                                   | Universal US + expectant         | 2933 (2502, 3366)        | 27.441 (27.261, 27.621)        | Dominated   | 545884 (542695, 549070)        |
|                                                                   | Universal US + induction         | 2917 (2484, 3352)        | 27.448 (27.268, 27.628)        | 48321       | 546050 (542850, 549236)        |
|                                                                   | Universal US + planned CS        | 2955 (2549, 3360)        | 27.396 (27.224, 27.565)        | Dominated   | 544956 (541919, 547978)        |

Options ordered from lowest to highest expected cost. ICERs calculated beginning with least expensive option, and comparing with next most expensive, non-dominated option; a policy was dominated / extended-dominated if any other policy or weighted average of two policies was associated with both lower costs and higher QALYs. Net monetary benefit (NMB) was calculated using a Willingness-To-Pay (WTP) threshold of £20,000; higher NMB value means greater cost-effectiveness. Option with the highest expected net monetary benefit highlighted in bold. All costs and NMB are given in sterling pounds (£). CS = Caesarean section; QALY = Quality adjusted life-year; ICER = Incremental cost-effectiveness ratio; NMB = Net monetary benefit; US = ultrasound.
